# Supplementary material for: Contributions of Microelectrochemical Scanning Techniques for the Efficient Detection of Localized Corrosion Processes at the Cut Edges of Polymer-Coated Galvanized Steel
Source: MDPI journal article supplement (doi:10.3390/molecules27072167), 2022-03-27

Article

# Contributions of Microelectrochemical Scanning Techniques for the Efficient Detection of Localized Corrosion Processes at the Cut Edges of Polymer-Coated Galvanized Steel

Dániel Filotás <sup>1,2,\*</sup>, Javier Izquierdo <sup>3,4</sup>, Bibiana M. Fernández-Pérez <sup>3</sup>, Livia Nagy <sup>1,2</sup>, Géza Nagy <sup>1,2</sup> and Ricardo M. Souto <sup>3,4,\*</sup>

<sup>1</sup> Department of General and Physical Chemistry, Faculty of Sciences, University of Pécs, Ifjúság útja 6, 7624 Pécs, Hungary; lnagy@ttk.pte.hu (L.N.); g-nagy@gamma.ttk.pte.hu (G.N.)

<sup>2</sup> János Szentágothai Research Center, University of Pécs, Ifjúság u. 20, 7624 Pécs, Hungary

<sup>3</sup> Department of Chemistry, Universidad de La Laguna, P.O. Box 456, 38200 La Laguna, Tenerife, Spain; jizquier@ull.edu.es (J.I.); bfernand@ull.edu.es (B.M.F.-P.)

<sup>4</sup> Institute of Material Science and Nanotechnology, Universidad de La Laguna, 38200 La Laguna, Tenerife, Spain

\* Correspondence: filotasdaniel@gmail.com (D.F.); rsouto@ull.es (R.M.S.)

**Figure S1.** Sequence of SVET maps recorded on the cut edge of galvanized steel without organic coating layers during immersion in 1 mM NaCl solution

The X-Y dimensions of the maps are  $1580 \times 6000 \mu\text{m}^2$ , while the coloring bars give the current density values expressed in  $\mu\text{A cm}^{-2}$ .

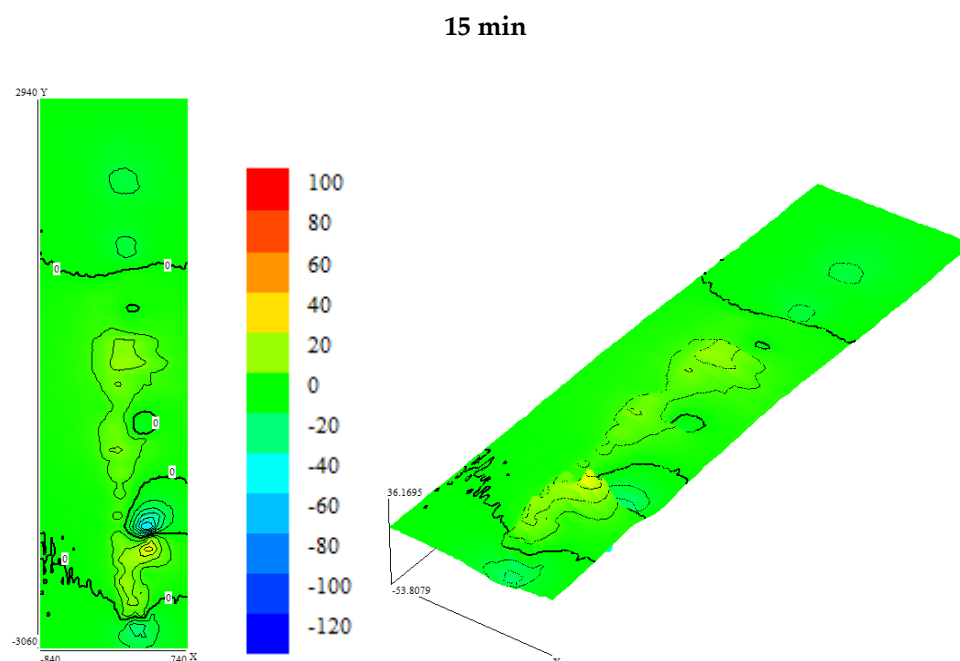

30 min

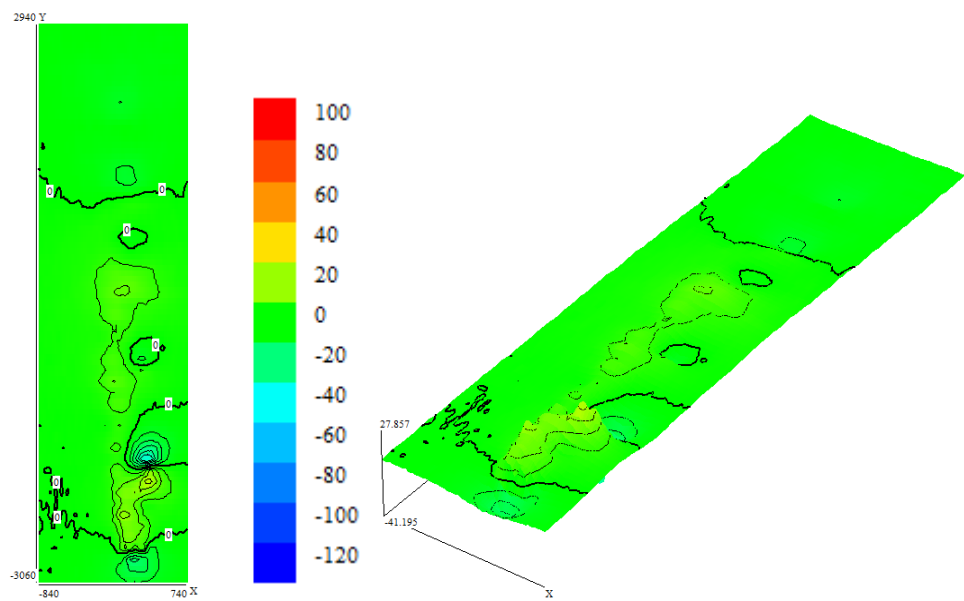

45 min

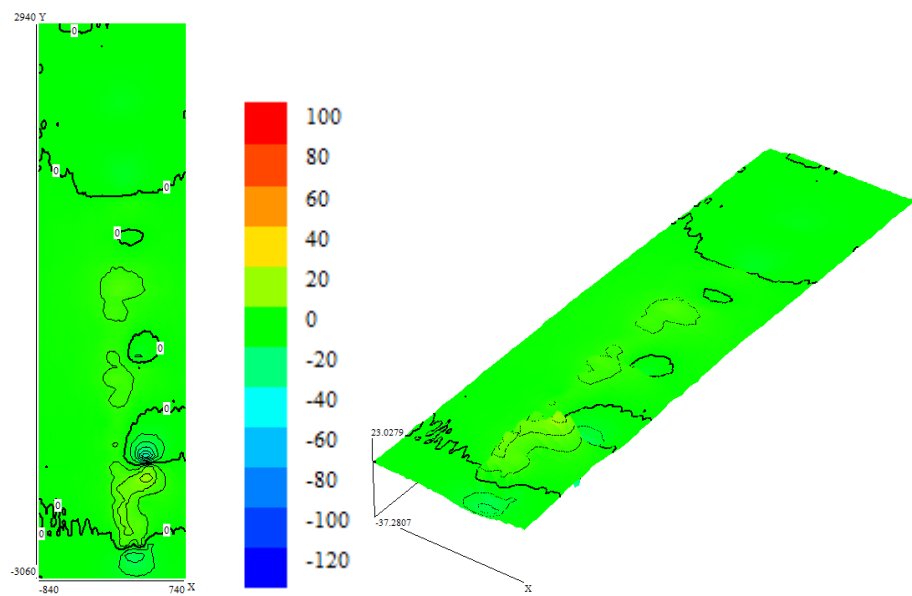

60 min

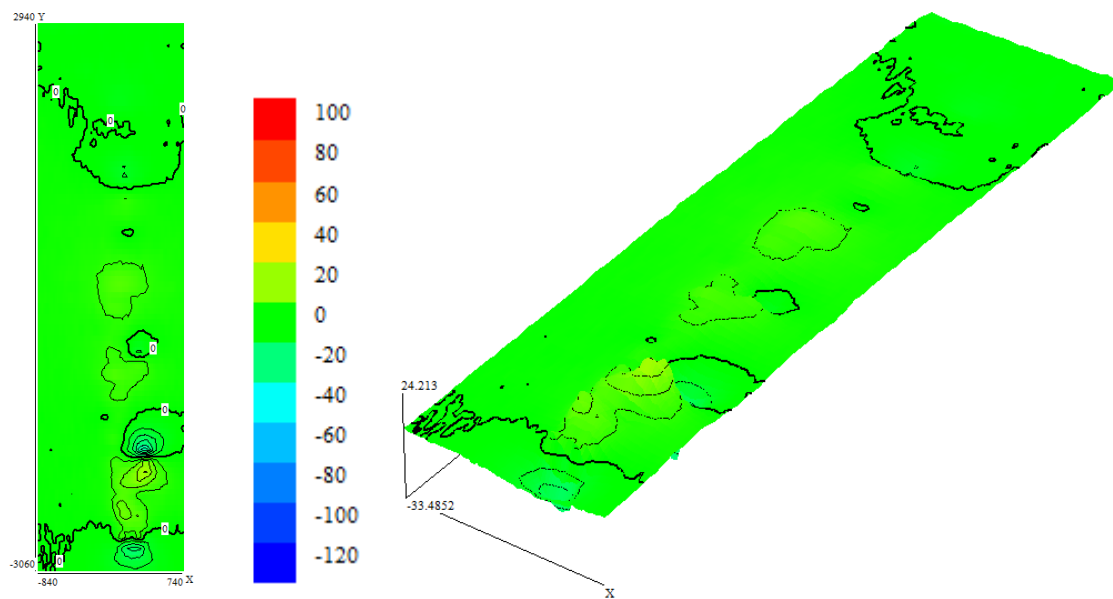

75 min

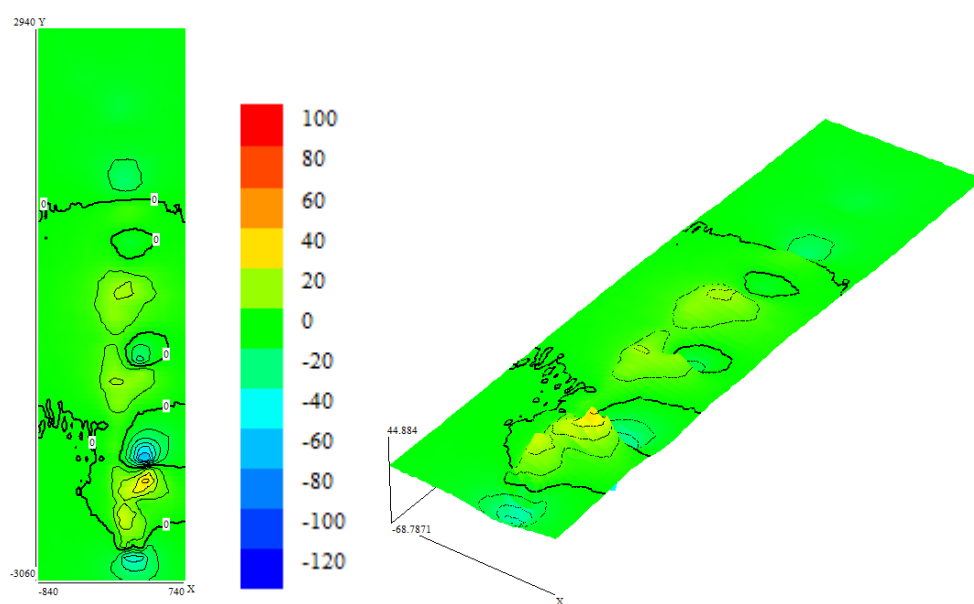

90 min

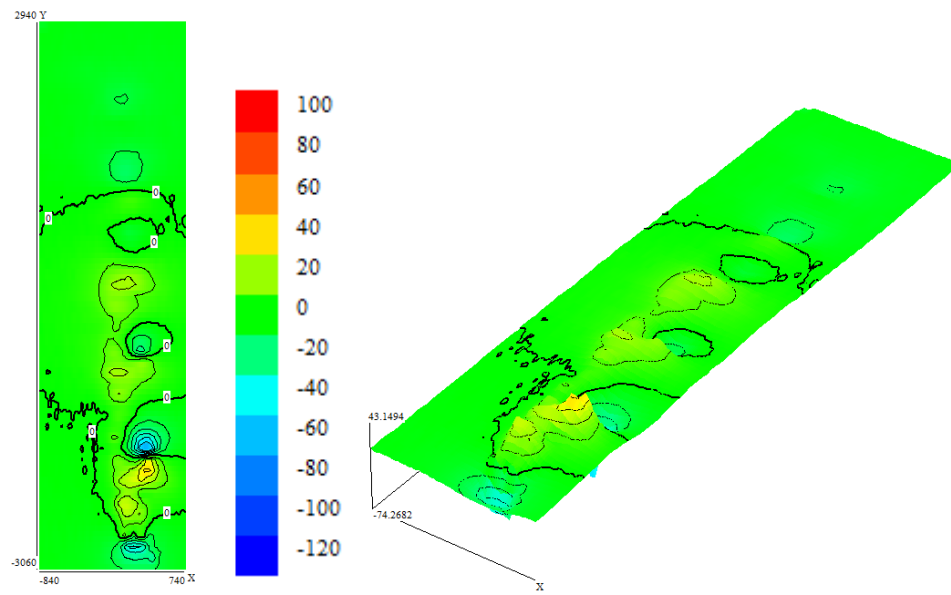

**105 min**

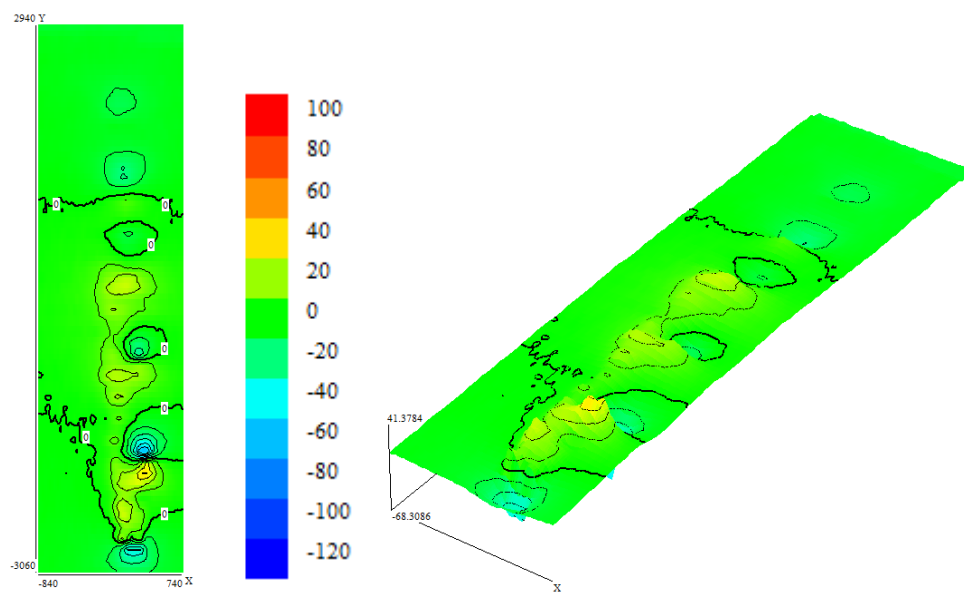

**120 min**

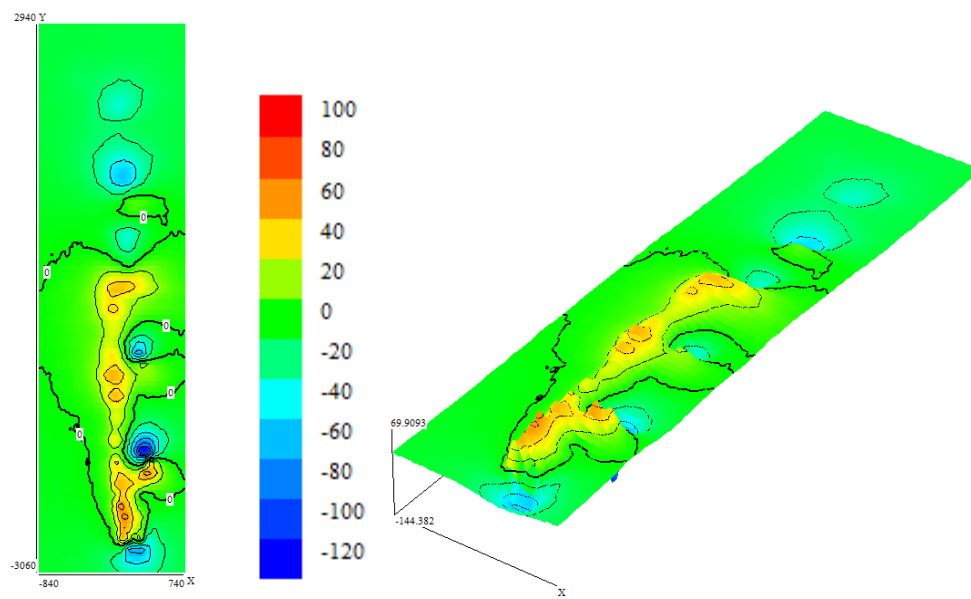

135 min

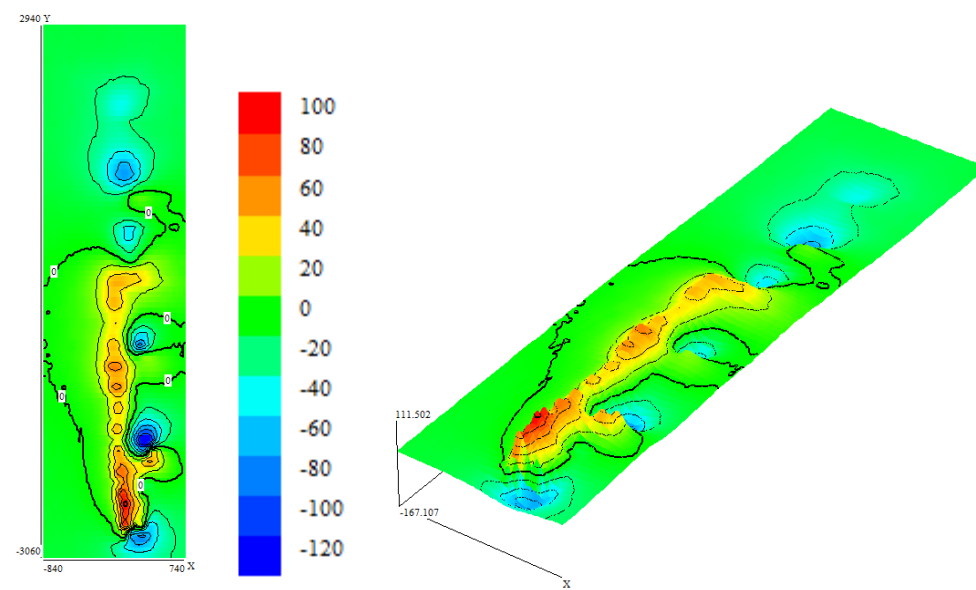

150 min

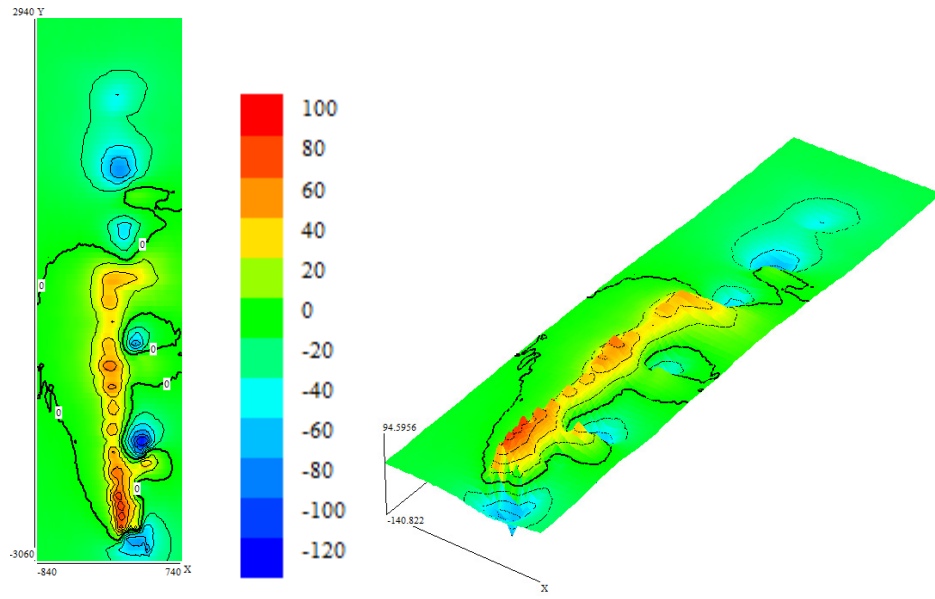

165 min

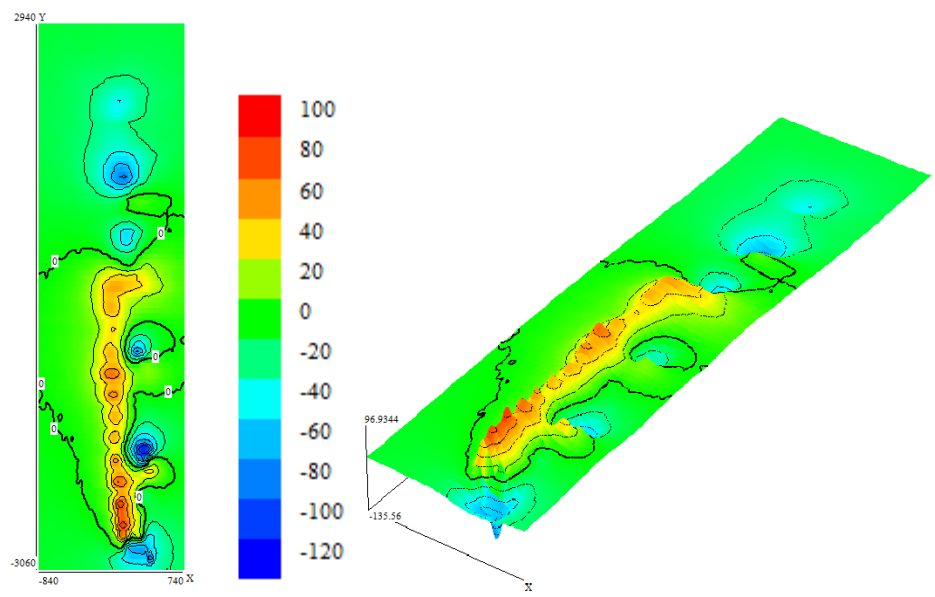

**Figure S2. Sequence of SVET maps recorded on the cut edge of the complete coil coating system during immersion in 1 mM NaCl solution**

The X-Y dimensions of the maps are  $1010 \times 2790 \mu\text{m}^2$ , while the coloring bars give the current density values expressed in  $\mu\text{A cm}^{-2}$ .

**15 min**

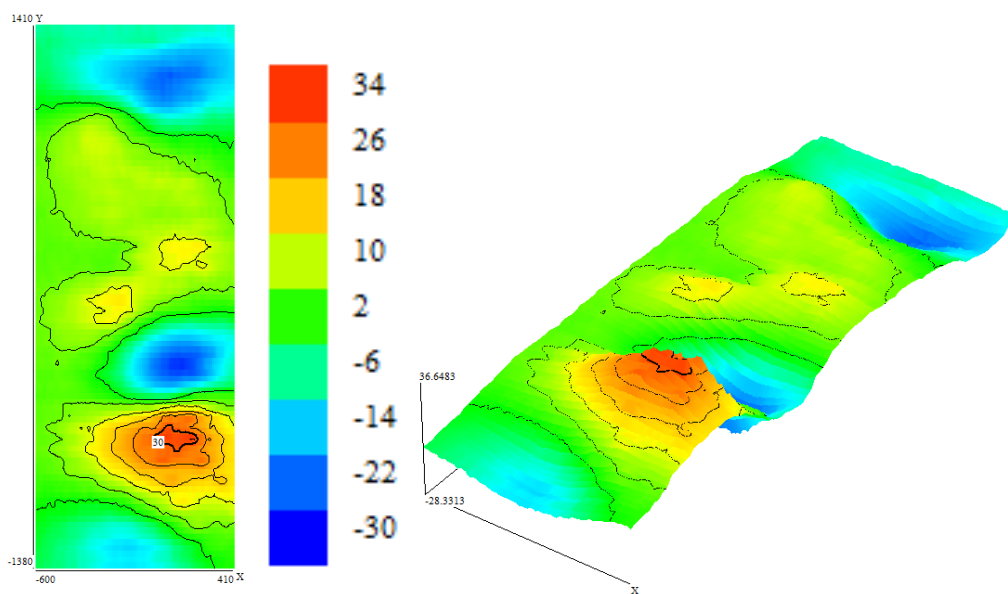

**30min**

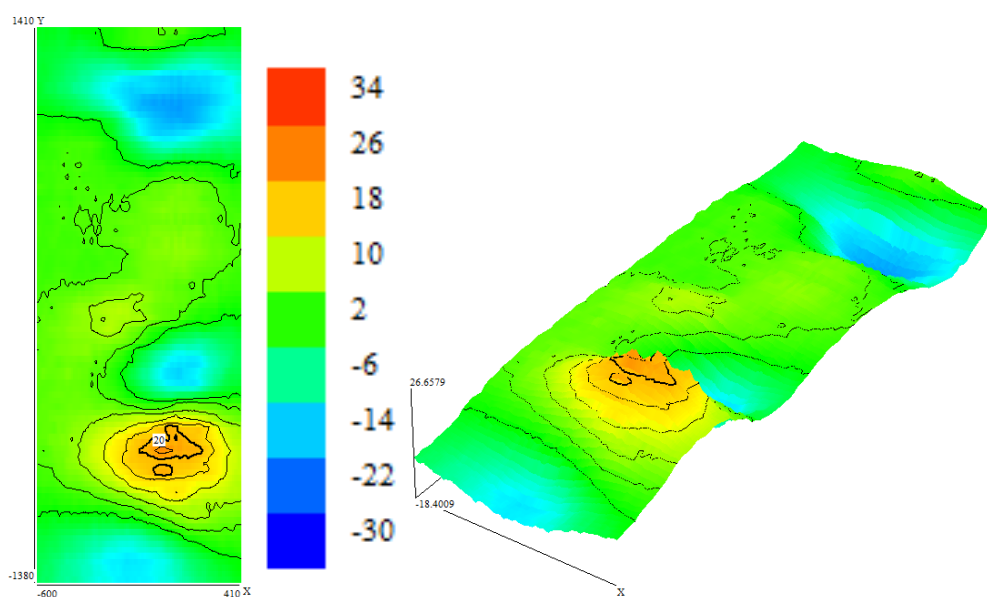

45 min

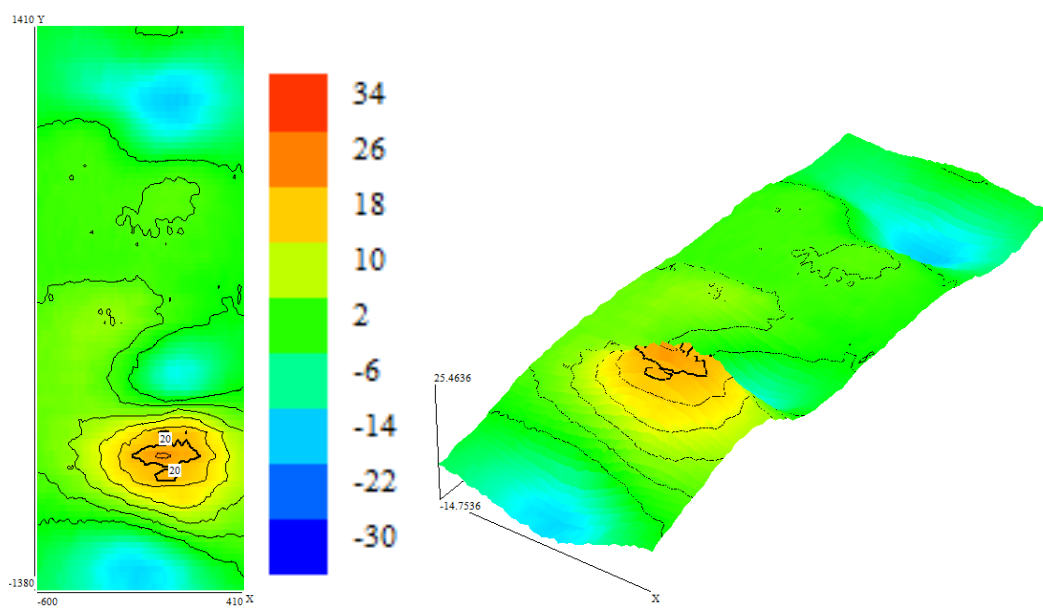

60 min

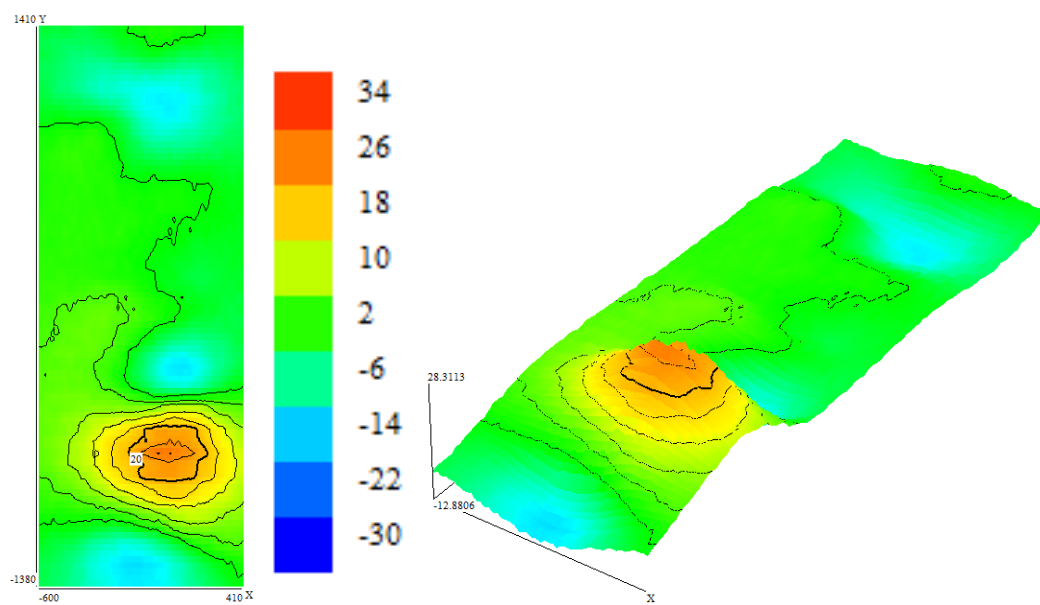



75 min

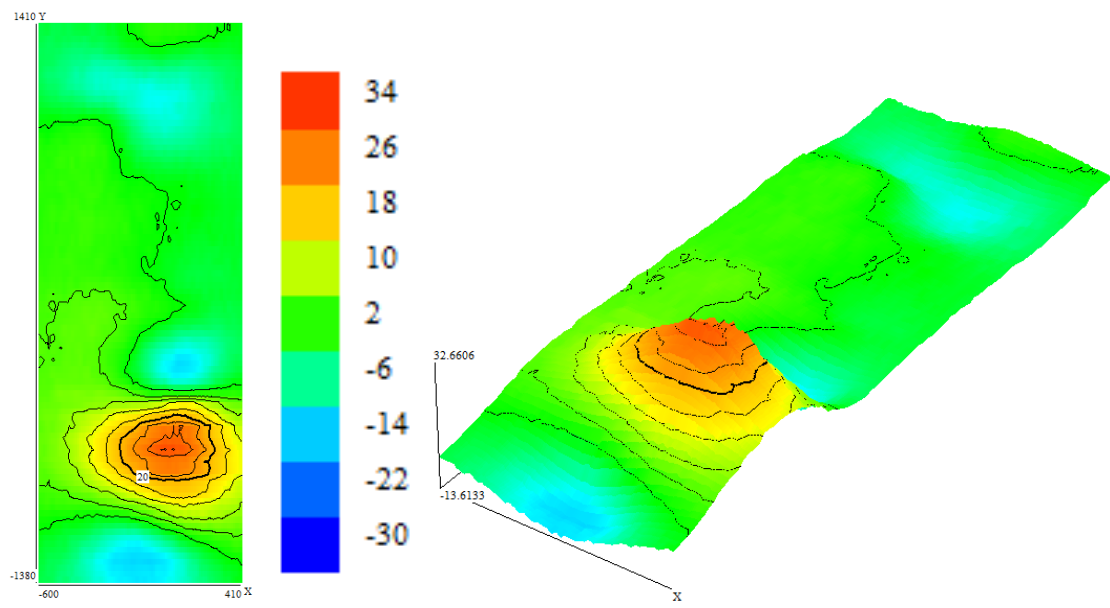

90 min

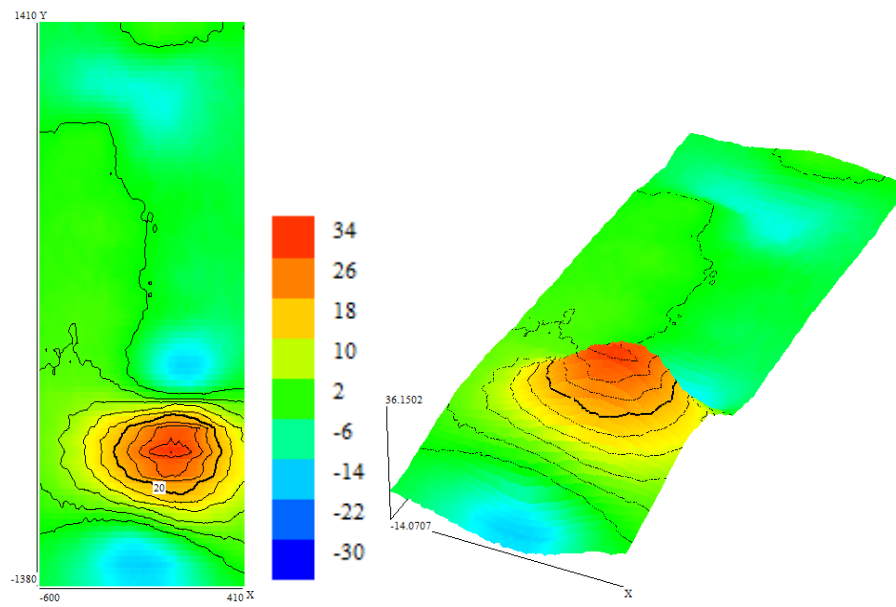

105 min

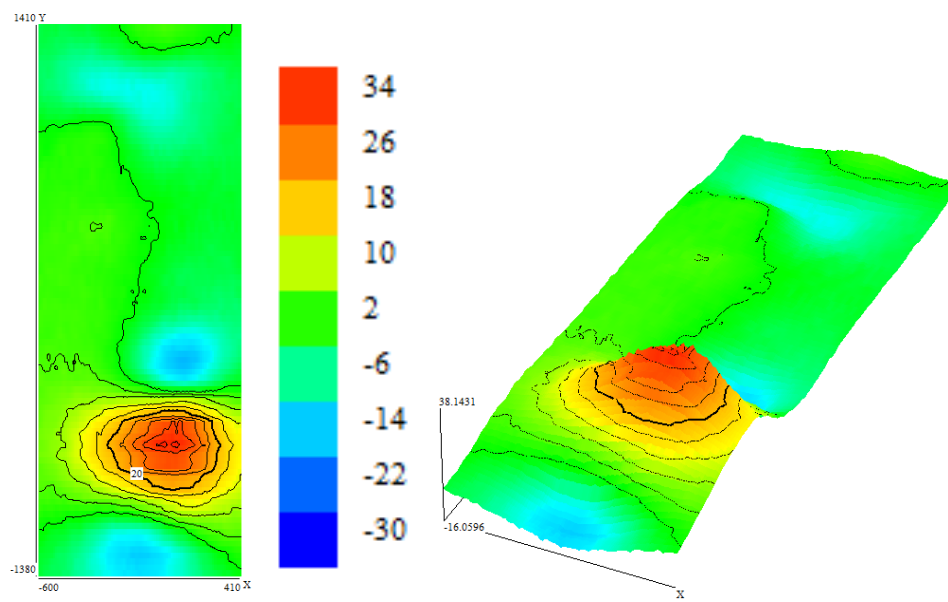

120 min

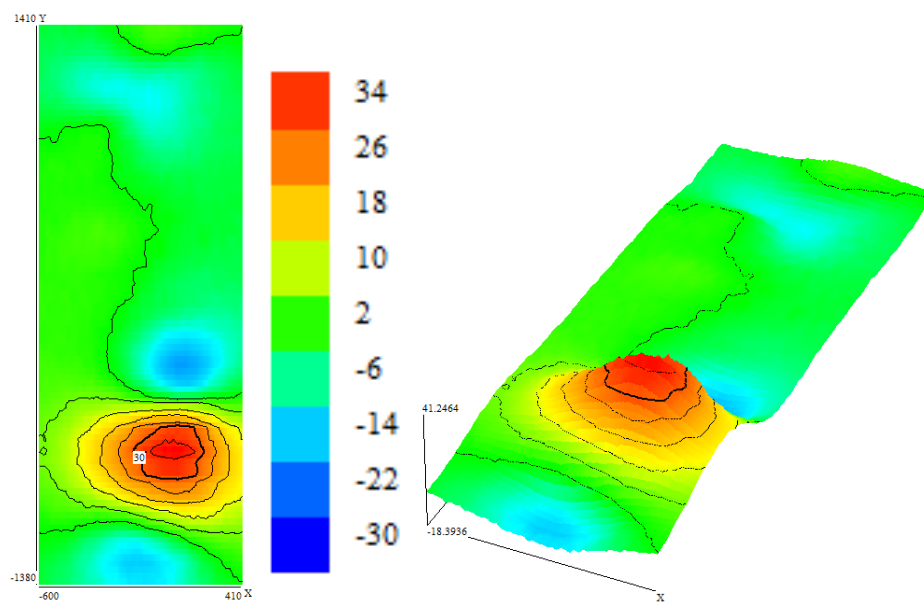

135 min

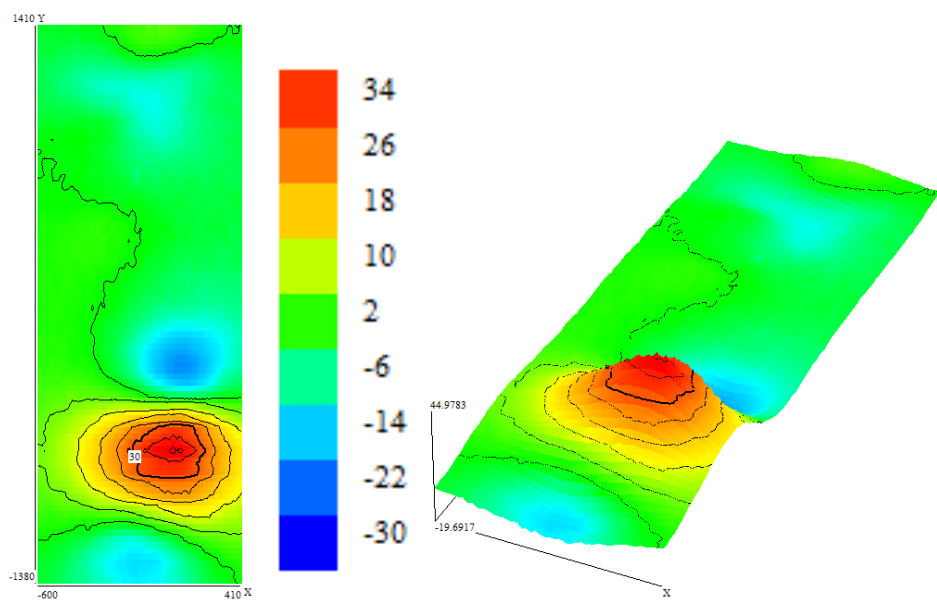

150 min

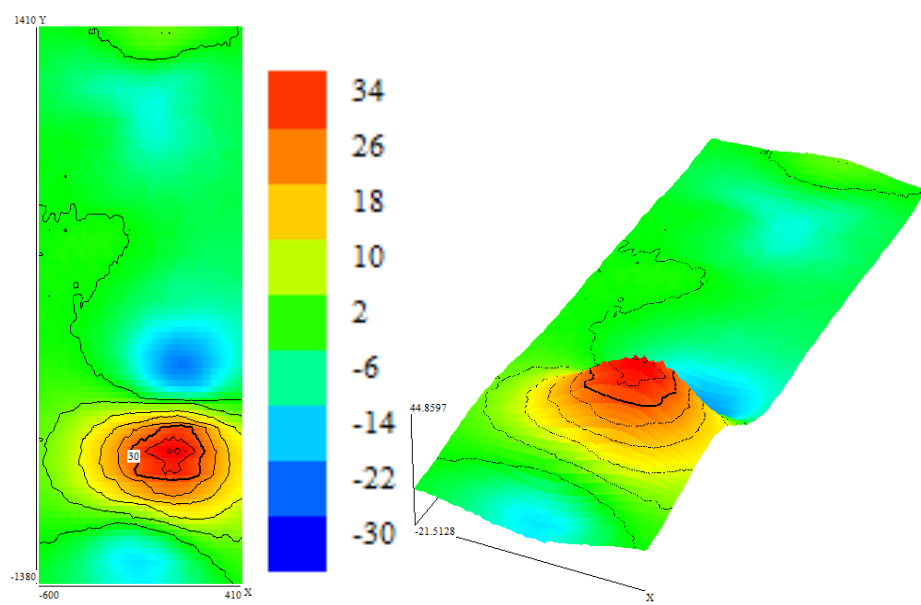

165 min

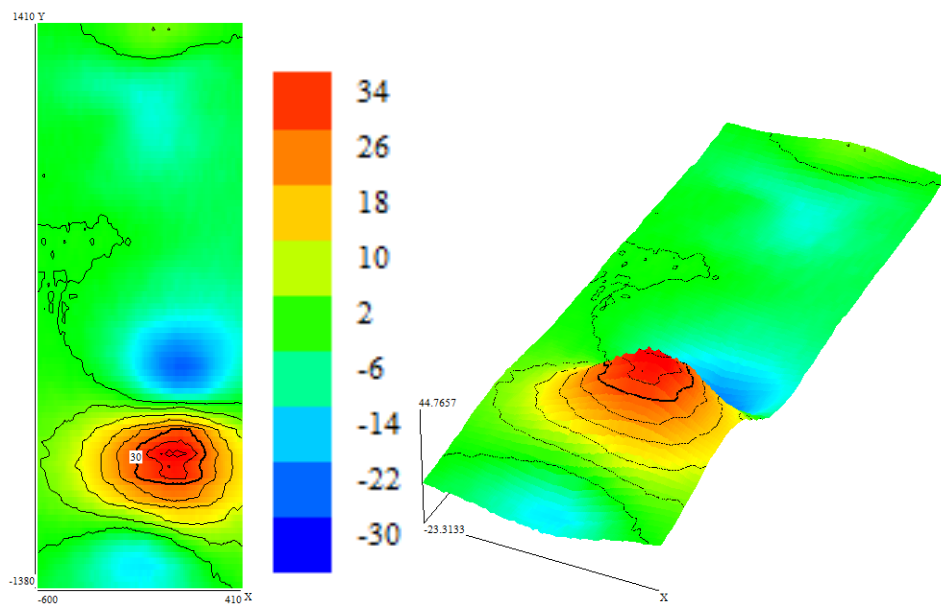

180 min

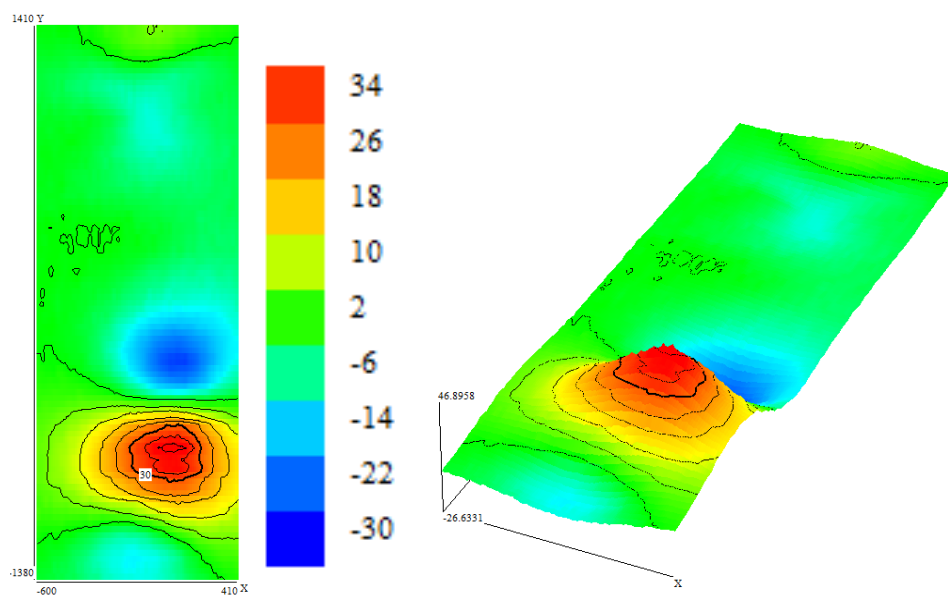

Supplement: s1 [file s1]
